# Supplementary material for: Application of the Ballroom Aerobic Test protocol for assessing performance in standard-style dancesport athletes
Source: PeerJ. 2026 Jan 13;14:e20556. doi: 10.7717/peerj.20556 (PMC12810390; doi:10.7717/peerj.20556)
Supplement: Supplemental Information 1 [file peerj-14-20556-s001.xlsx]

## Sheet: Sheet1
Sex (men=1; women=2)	Experience	Height	Weight	BMI	TIME1	V_BPM1	VO2_LMIN1	VO2_KG1	RER1	VE1	VT1	BF1	VO2NORM1	BRNORM1	VE_VO21	VE_VCO21	VD_VT1	TIME2	V_BPM2	VO2_LMIN2	VO2_KG2	RER2	VE2	VT2	BF2	VO2NORM2	BRNORM2	VE_VO22	VE_VCO22	VD_VT2
1	6	185	74.1	21.65	10.24	215	3.95	53.27	1.11	87.2	1.93	45	112	31	30.1	27.3	0.11	8.27	208	3.68	47.28	1.07	92	1.85	55	99	32	30.8	29.6	0.13
1	7	184	73.6	21.74	12.27	236	3.65	49.64	1.04	127.6	2.19	58	104	31	32.2	31	0.14	8.1	228	3.69	50.6	1.06	113.9	1.92	56	96	34	30	28.9	0.15
1	6	176	66	21.31	6.3	196	2.88	44	0.92	97	1.96	50	93	43	31.4	34.1	0.14	9.18	186	3.33	50	0.96	104.8	1.94	52	97	41	32.7	39.3	0.14
1	8	185	79.7	23.29	13.04	243	3.81	47.85	1.06	137.9	2.32	60	103	26	33.5	31.8	0.11	9.45	235	3.7	46.36	1.07	126.1	2.27	55	98	27	30.9	32.4	0.12
1	6	174	62.2	20.54	10.17	208	3.64	58.53	1.08	116.1	1.99	58	115	30	29.1	27.4	0.11	10.15	208	3.46	55.7	1.08	114.1	1.87	62	111	32	28.1	29	0.12
1	7	177	56.8	18.13	10.13	208	3.14	55.3	0.97	99.5	1.58	63	102	38	29.1	30	0.15	9.45	201	2.91	52.29	0.92	98.5	1.48	66	96	39	30.4	32.3	0.16
1	20	183	78.8	23.53	10.29	208	4.2	53.33	1.04	156.3	2.28	71	128	13	35	33.7	0.17	10.15	208	4.18	53.1	1.02	149.1	2.14	70	128	15	32.7	32.2	0.16
2	15	162	58	22.1	10.09	215	3.12	54	1.02	98.6	1.84	54	165	18	29.5	28.8	0.14	10.22	208	3	53	1.03	89.7	1.94	50	161	16	27.5	26.6	0.14
2	6	175	59	19.27	12.31	243	2.95	50	1.04	99.6	1.64	61	136	30	31	29.9	0.15	9.5	231	2.74	46	1.05	91.4	1.47	55	126	33	29	28.3	0.14
2	6	160	47	18.36	10.17	208	2.34	50	1.01	76.4	1.44	53	120	35	29.8	29.5	0.14	9.52	201	2.23	47	1	72.6	1.37	53	114	38	29.7	29.6	0.14
2	8	174	63	20.81	11.57	229	2.46	39	1.01	82	1.65	50	114	43	30.8	30.5	0.13	5.3	225	2.16	34	1.05	81.9	1.51	47	110	44	28.9	30.4	0.13
2	9	173	60	20.05	10.05	215	2.43	41	0.98	89.8	1.53	59	113	36	34	34.6	0.17	5.3	215	2.28	38	0.94	78.5	1.46	56	106	40	32.5	33.6	0.15
2	7	167	58	20.8	12.09	243	2.56	44	1.04	70.3	2.07	34	123	46	25.8	24.9	0.13	9.56	240	2.38	42	1.03	62.6	1.97	36	114	46	24.4	26.1	0.12
